# Supplementary material for: Future climate response to Antarctic Ice Sheet melt caused by anthropogenic warming
Source: PubMed Central journal article supplement — Sci Adv. 2020 Sep 23;6(39):eaaz1169. doi: 10.1126/sciadv.aaz1169 (PMC7531873; doi:10.1126/sciadv.aaz1169), 2020-09-23
Supplement: aaz1169_SM.pdf [file aaz1169_SM.pdf]

[advances.sciencemag.org/cgi/content/full/6/39/eaaz1169/DC1](https://advances.sciencemag.org/cgi/content/full/6/39/eaaz1169/DC1)

## Supplementary Materials for

### **Future climate response to Antarctic Ice Sheet melt caused by anthropogenic warming**

Shaina Sadai\*, Alan Condron, Robert DeConto, David Pollard

\*Corresponding author. Email: [srogstad@geo.umass.edu](mailto:srogstad@geo.umass.edu)

Published 23 September 2020, *Sci. Adv.* **6**, eaaz1169 (2020)

DOI: [10.1126/sciadv.aaz1169](https://doi.org/10.1126/sciadv.aaz1169)

#### **This PDF file includes:**

Figs. S1 to S9

Table S1

a

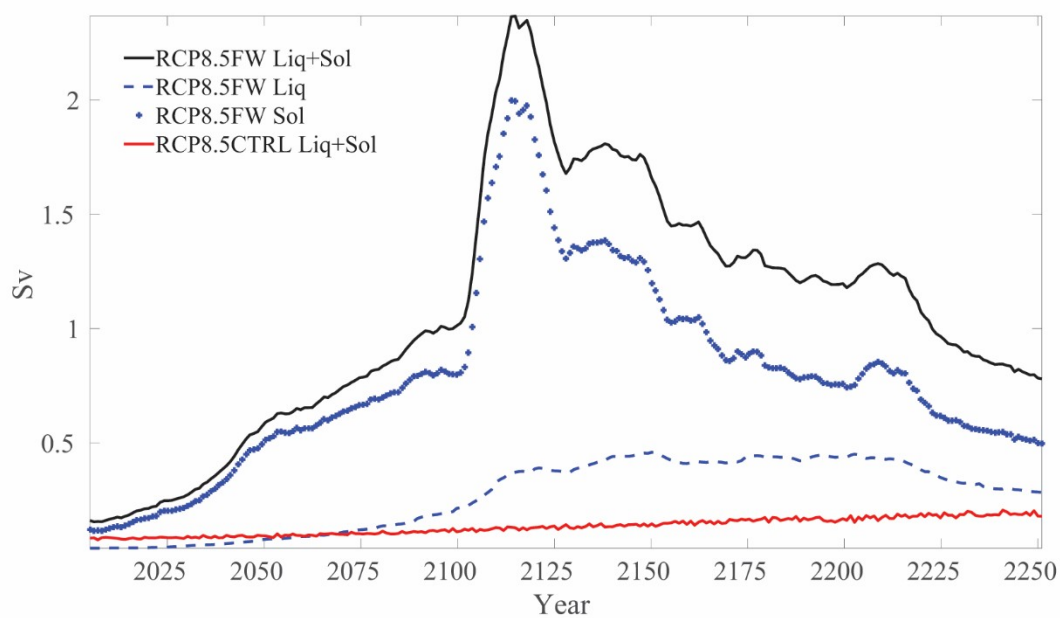

b

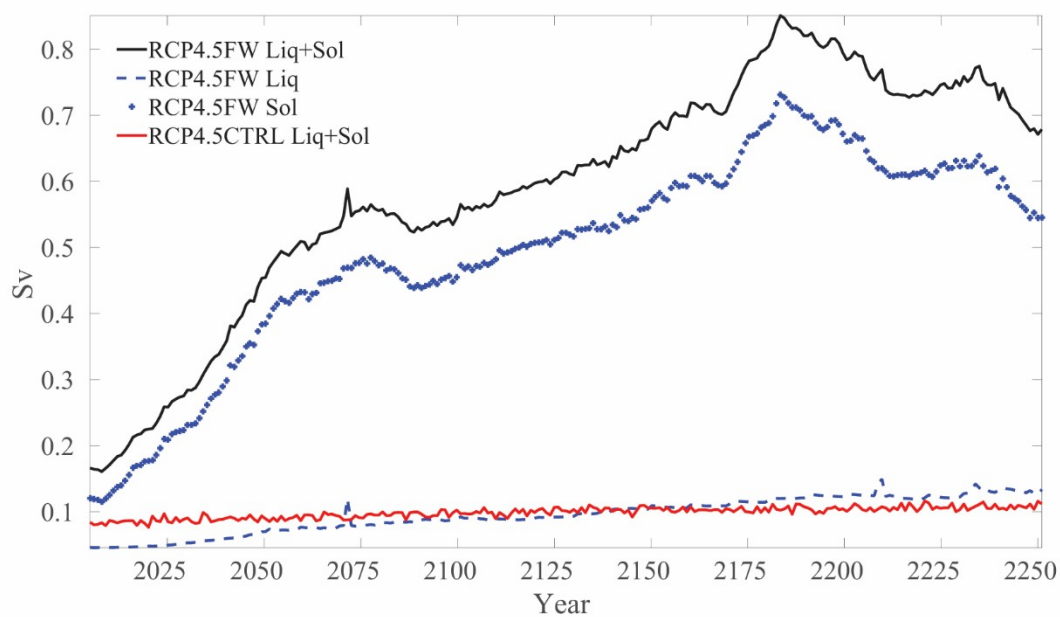

**Fig. S1. Freshwater forcing quantities.** (A) The forcing used in RCP8.5FW is shown with liquid and solid components separate, as well as combined, alongside the forcing computed by CESM in RCP8.5CTRL. (B) The same is (A), but for RCP4.5.

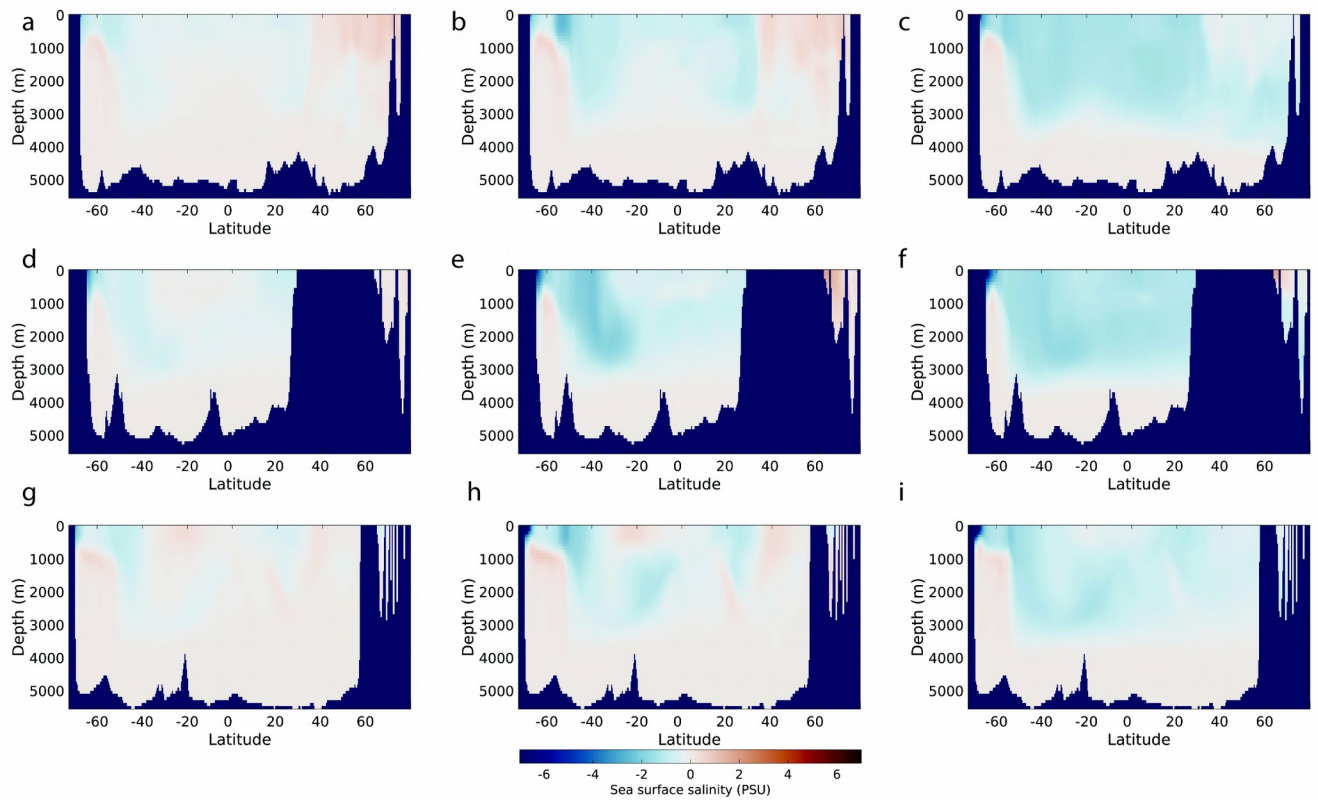

**Fig. S2. Salinity distribution at depth in RCP8.5FW.** (A to C) Salinity difference (RCP8.5FW minus RCP8.5CTRL) at depth, at longitude 342 in the Atlantic basin and decadal averaged for the time periods 2091-2100 (A), 2121-2130 (B), and 2191-2200 (D). (D to F), The same but for the Indian Ocean at longitude 72. (G to I) The same for the Pacific Ocean at longitude 213.

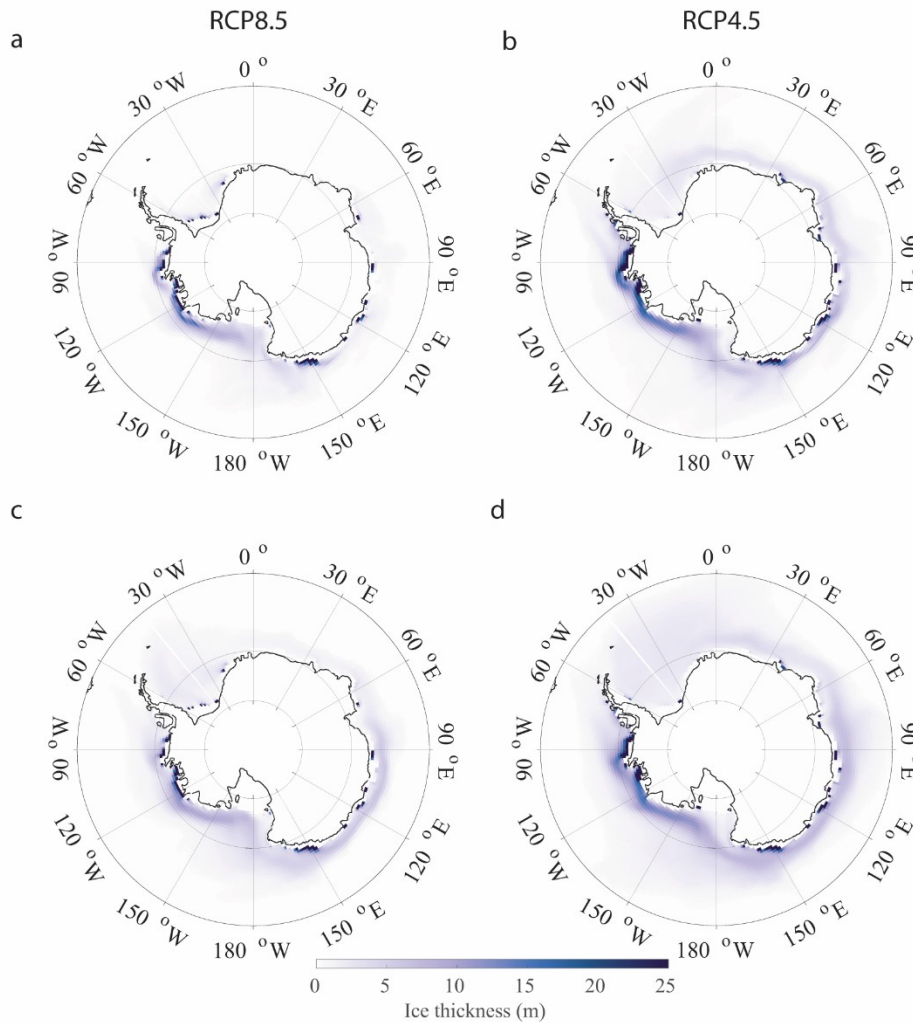

**Fig. S3. Southern Ocean sea ice in the 2190s.** (A) Southern Ocean sea ice in RCP8.5FW at the end of the 21<sup>st</sup> century decadal averaged from 2191-2200 for February. Grid cells where ice area is <10% and ice thickness is <0.005 m have been removed. (B) The same period is shown for RCP4.5FW. Note the more extensive sea ice development for this time period compared to RCP8.5FW. (C) RCP8.5FW in September for the same time span as (A) and (B). (D) RCP4.5FW in September for the same time span as (A to C). RCP8.5CTRL RCP4.5CTRL are not included as there is virtually no ice in those runs for this time period (Fig. 2a).

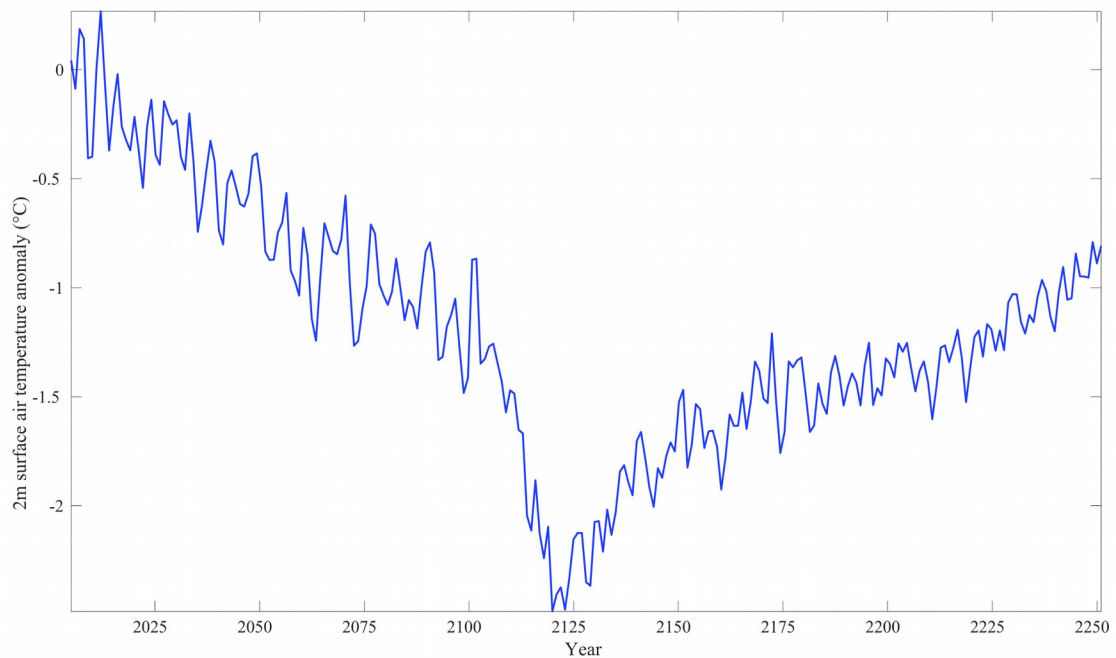

**Fig. S4. Globally averaged 2 meter air temperature anomaly.** The difference in 2 m air temperature between RCP8.5FW and RCP8.5CTRL is maximized during peak Antarctic ice loss, peaking at around 2.5°C between years 2120-2125. The AIS discharge perturbation delays the warming, but once the AIS is exhausted of ice the temperatures between the two runs begin to converge.

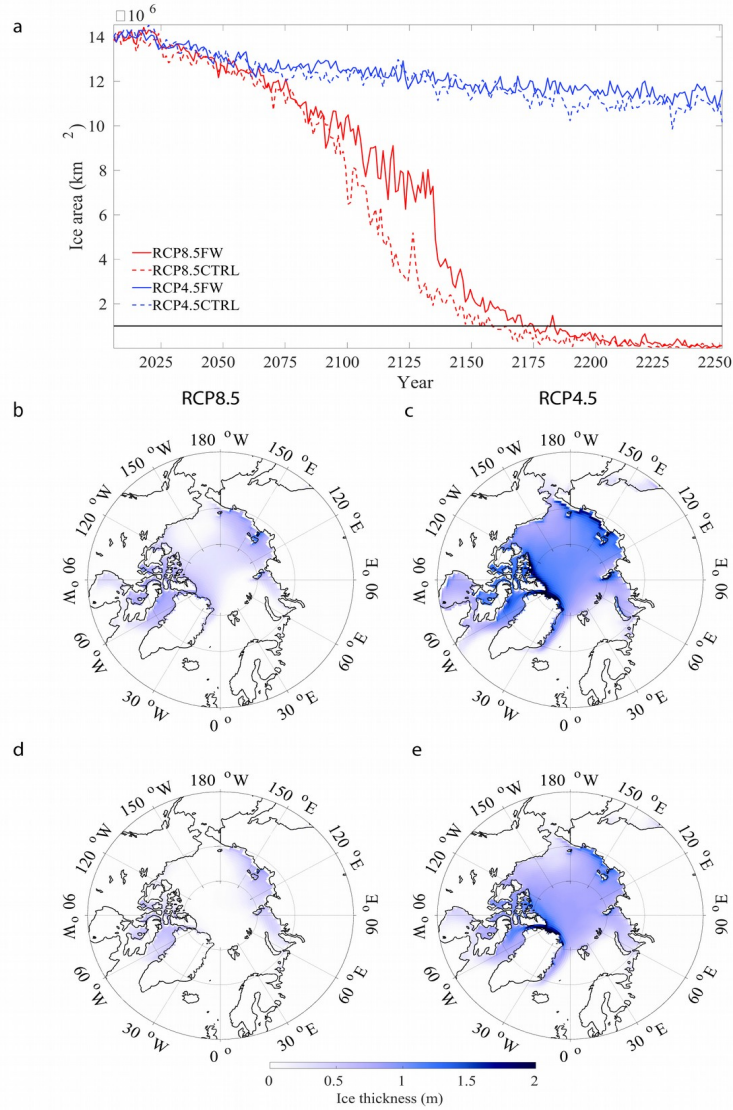

**Fig. S5. Winter Arctic sea ice.** (A) Arctic ice loss is delayed during the 21<sup>st</sup> century in RCP8.5FW due to delayed surface air temperature increases as a result of the AIS discharge forcing. The black line represents ice free conditions defined as 1 million square kilometers. (B) RCP8.5FW, (C) RCP4.5FW, (D) RCP8.5CTRL, (E) RCP4.5CTRL show sea ice thickness for February, decadal averaged from 2121-2130. Grid cells where ice area is less than 10% and ice thickness is less than 0.005 m have been removed.

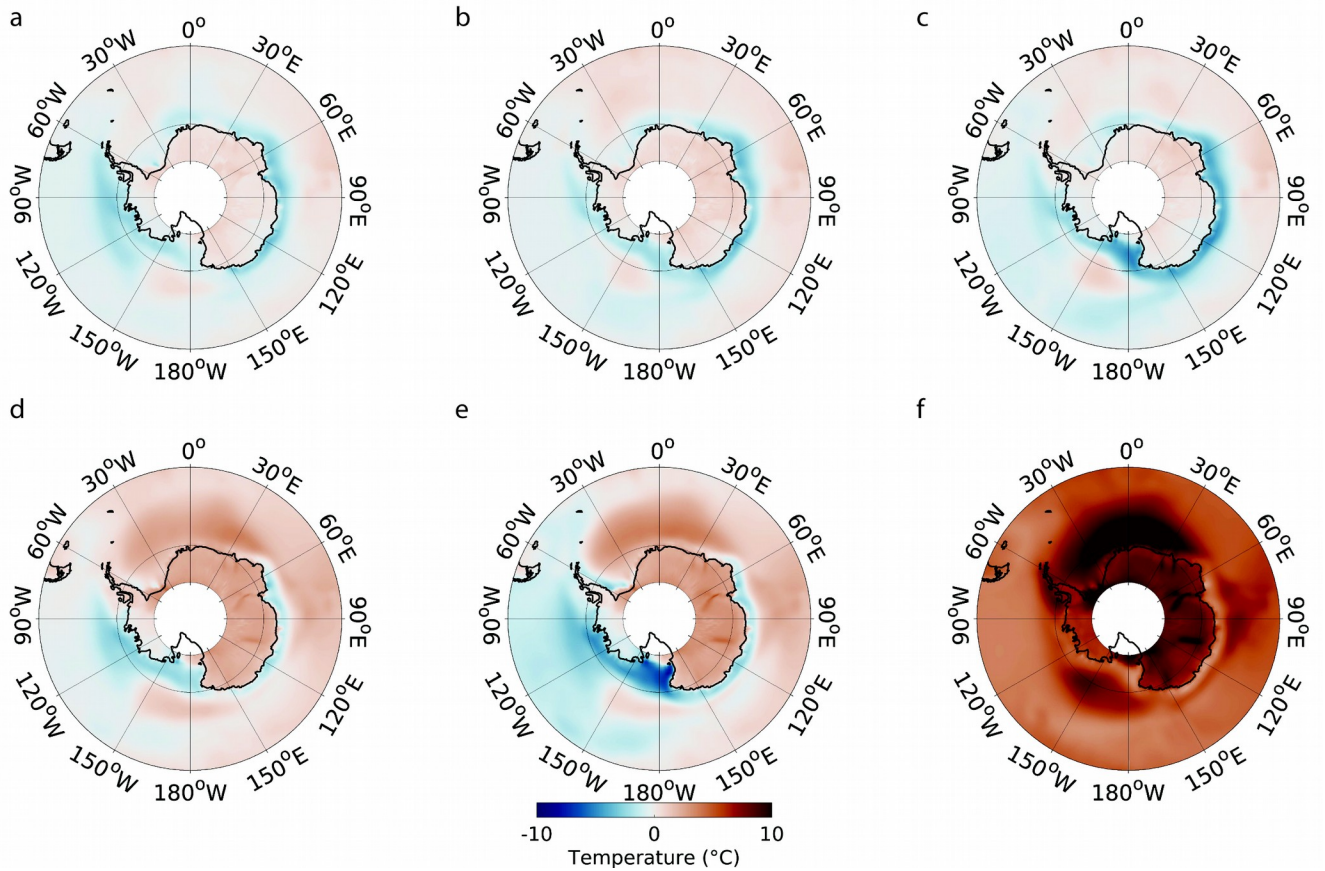

**Fig. S6. Southern Ocean 2m air temperature evolution.** (A) Surface air temperature for RCP4.5FW averaged from 2091-2100 minus the 2005-2014 average. The same is shown for (B) 2121-2130 and (C) 2191-2200. The expansion of sea ice where the freshwater perturbation was applied has lower SAT values than at the start of the run, due to the sustained freshwater forcing in this experiment. (D to F) The same time periods for RCP8.5FW shows that this effect is sustained only through the peak AIS discharge period; after that temperatures rise rapidly due to anthropogenic greenhouse gas forcing.

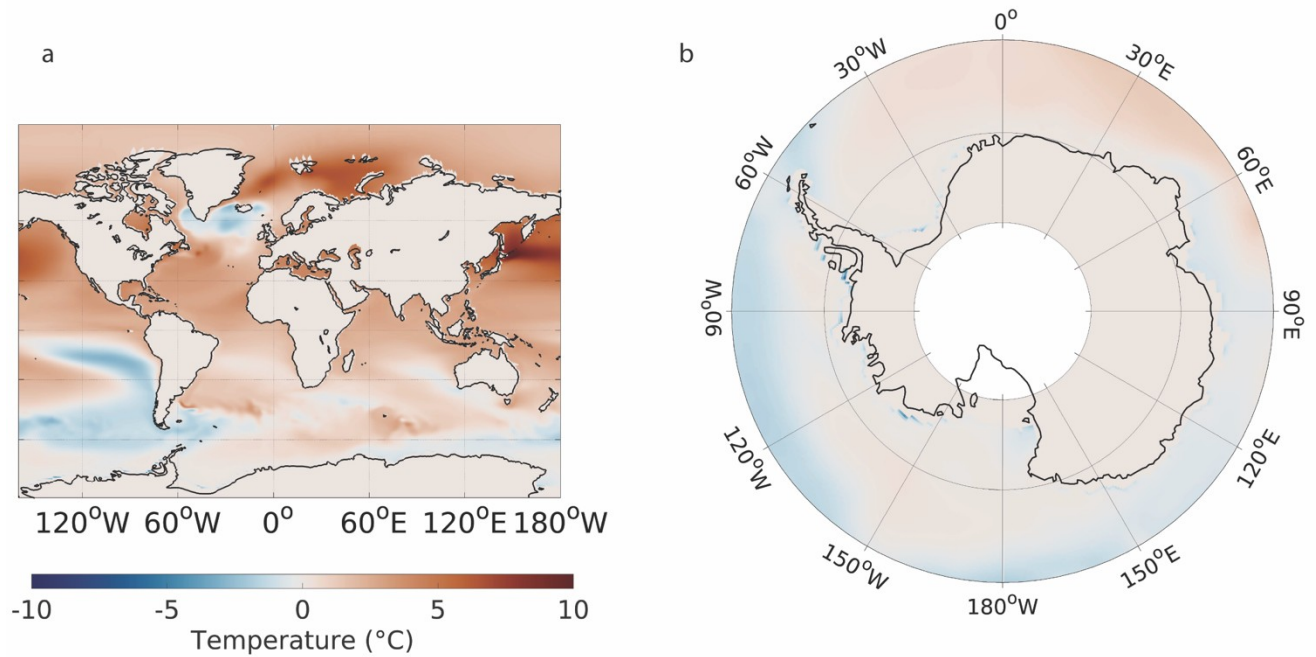

**Fig. S7. Sea surface temperature (SST) evolution.** (A) The SST values for RCP8.5FW decadally averaged from 2121-2130, compared to the decadal averages from 2005-2014 (first decade of the run) show that during peak AIS discharge the SST values in the Southern Ocean are lower than at the start of the simulation. (B) The same data shown in a polar stereographic projection.

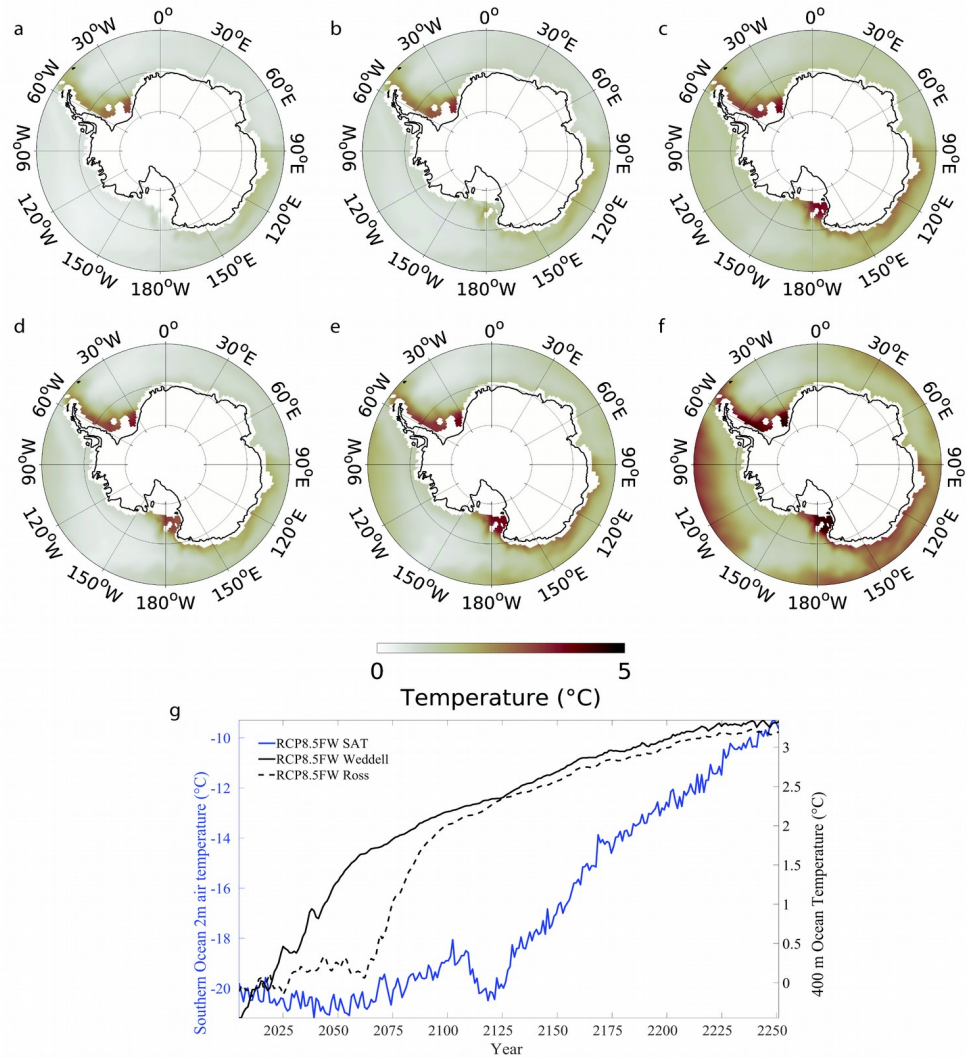

**Fig. S8. Ocean temperature evolution at 400 m in FW simulations.** (A) 400 m water temperature in RCP4.5FW with the 2005-2014 (first decade of the integration) average subtracted from the 2091-2100 average. (B) RCP4.5FW 2005-2014 average subtracted from the 2121-2130 average. (C) RCP4.5FW 2005-2014 average subtracted from the 2191-2200 average. (D to F) The same time periods as above but for RCP8.5FW. (G) The temperature evolution in the Ross and Weddell Seas at 400 m as compared to the surface air temperature over the Southern Ocean in RCP8.5FW.

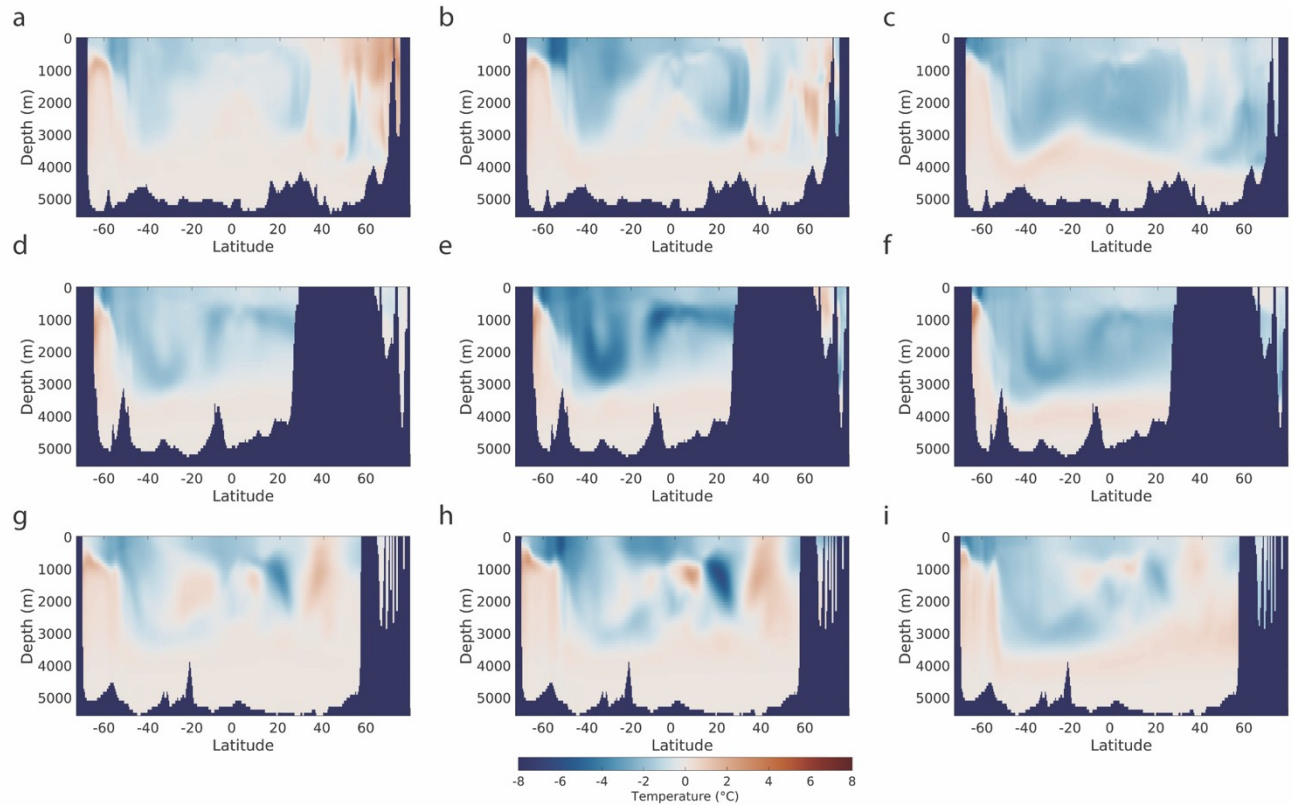

**Fig. S9. Temperature anomaly at depth.** (A to C) The temperature difference between RCP8.5FW and RCP8.5CTRL at depth for the Atlantic, decadal averaged for the time periods 2091-2100 (a), 2121-2130 (b), and 2191-2200 (c). (D to F) The same as (A to C) but for the Indian Ocean. (G to I) The same as (A to C) but for the Pacific Ocean. The cooler sub-surface ocean temperatures relative to the simulation without freshwater forcing from AIS discharge forcing are pervasive throughout much of the water column above 4000 m depth. Warmer relative temperatures in the perturbation run are evident at depths below 400 m in the Southern Ocean.

**Table S1**

|                                       | RCP8.5FW | RCP8.5CTRL | RCP4.5FW | RCP4.5CTRL |
|---------------------------------------|----------|------------|----------|------------|
| <b>2006</b>                           |          |            |          |            |
| GMST (C)                              | 14.0539  | 14.0120    | 14.1929  | 14.1226    |
| GMST increase over 1979-2000 (C)      | 0.3950   | 0.3531     | 0.5340   | 0.4637     |
| Southern Ocean air temperature        | -19.7941 | -19.7299   | -19.7903 | -19.8114   |
| AMOC (Sv)                             | 24.9189  | 24.2989    | 24.3412  | 24.3237    |
| Southern Ocean ice area ( $10^6 km$ ) | 3.1276   | 3.2739     | 2.8595   | 2.4876     |
| <b>2050</b>                           |          |            |          |            |
| GMST                                  | 15.4120  | 15.7964    | 14.4843  | 15.3484    |
| GMST increase over 1979-2000          | 1.7531   | 2.1375     | 0.8253   | 1.6895     |
| Southern Ocean air temperature        | -20.7809 | -18.0770   | -21.0767 | -18.3307   |
| AMOC                                  | 19.4244  | 20.6395    | 21.6083  | 20.9936    |
| Southern Ocean ice area               | 5.4382   | 1.8630     | 5.4666   | 1.9562     |
| <b>2100</b>                           |          |            |          |            |
| GMST                                  | 17.0289  | 18.4440    | 15.4751  | 16.1700    |
| GMST increase over 1979-2000          | 3.3700   | 4.7851     | 1.8161   | 2.5110     |
| Southern Ocean air temperature        | -18.8967 | -14.1521   | -19.7687 | -17.5023   |
| AMOC                                  | 15.2980  | 12.1330    | 19.9960  | 17.7662    |
| Southern Ocean ice area               | 4.2109   | 0.0837     | 5.0735   | 1.3677     |
| <b>2200</b>                           |          |            |          |            |
| GMST                                  | 21.2402  | 22.5913    | 15.7283  | 16.9301    |
| GMST increase over 1979-2000          | 7.5813   | 8.9324     | 2.0693   | 3.2712     |
| Southern Ocean air temperature        | -12.5720 | -7.9139    | -20.4821 | -16.4034   |
| AMOC                                  | 8.3380   | 9.4018     | 19.6999  | 21.2097    |
| Southern Ocean ice area               | 1.3659   | 0.0000     | 5.7304   | 0.4388     |
| <b>2250</b>                           |          |            |          |            |
| GMST                                  | 22.8242  | 23.6334    | 15.8442  | 17.3196    |
| GMST increase over 1979-2000          | 9.1653   | 9.9745     | 2.1852   | 3.6607     |
| SO Temp                               | -9.4375  | -6.3080    | -19.4973 | -15.6418   |
| AMOC                                  | 7.7511   | 7.9471     | 19.2572  | 21.4680    |
| Southern Ocean ice area               | 0.4567   | 0.0000     | 4.2865   | 0.4293     |

**Table. S1. Select model values.** Tabulated model quantities include globally averaged 2 m surface air temperatures, 2 m surface air temperature rise averaged over 1979-2000, relative to (13.66°C) from the CESM pre-industrial simulation. 2 m air temperature averaged over the Southern Ocean, maximum AMOC strength in the North Atlantic, and the area of the Southern Ocean covered by sea ice.
